# Supplementary material for: Exposure to the gut microbiota drives distinct methylome and transcriptome changes in intestinal epithelial cells during postnatal development
Source: PubMed Central journal article supplement (PMC5899322; doi:10.1186/s13073-018-0534-5), 2018-04-13

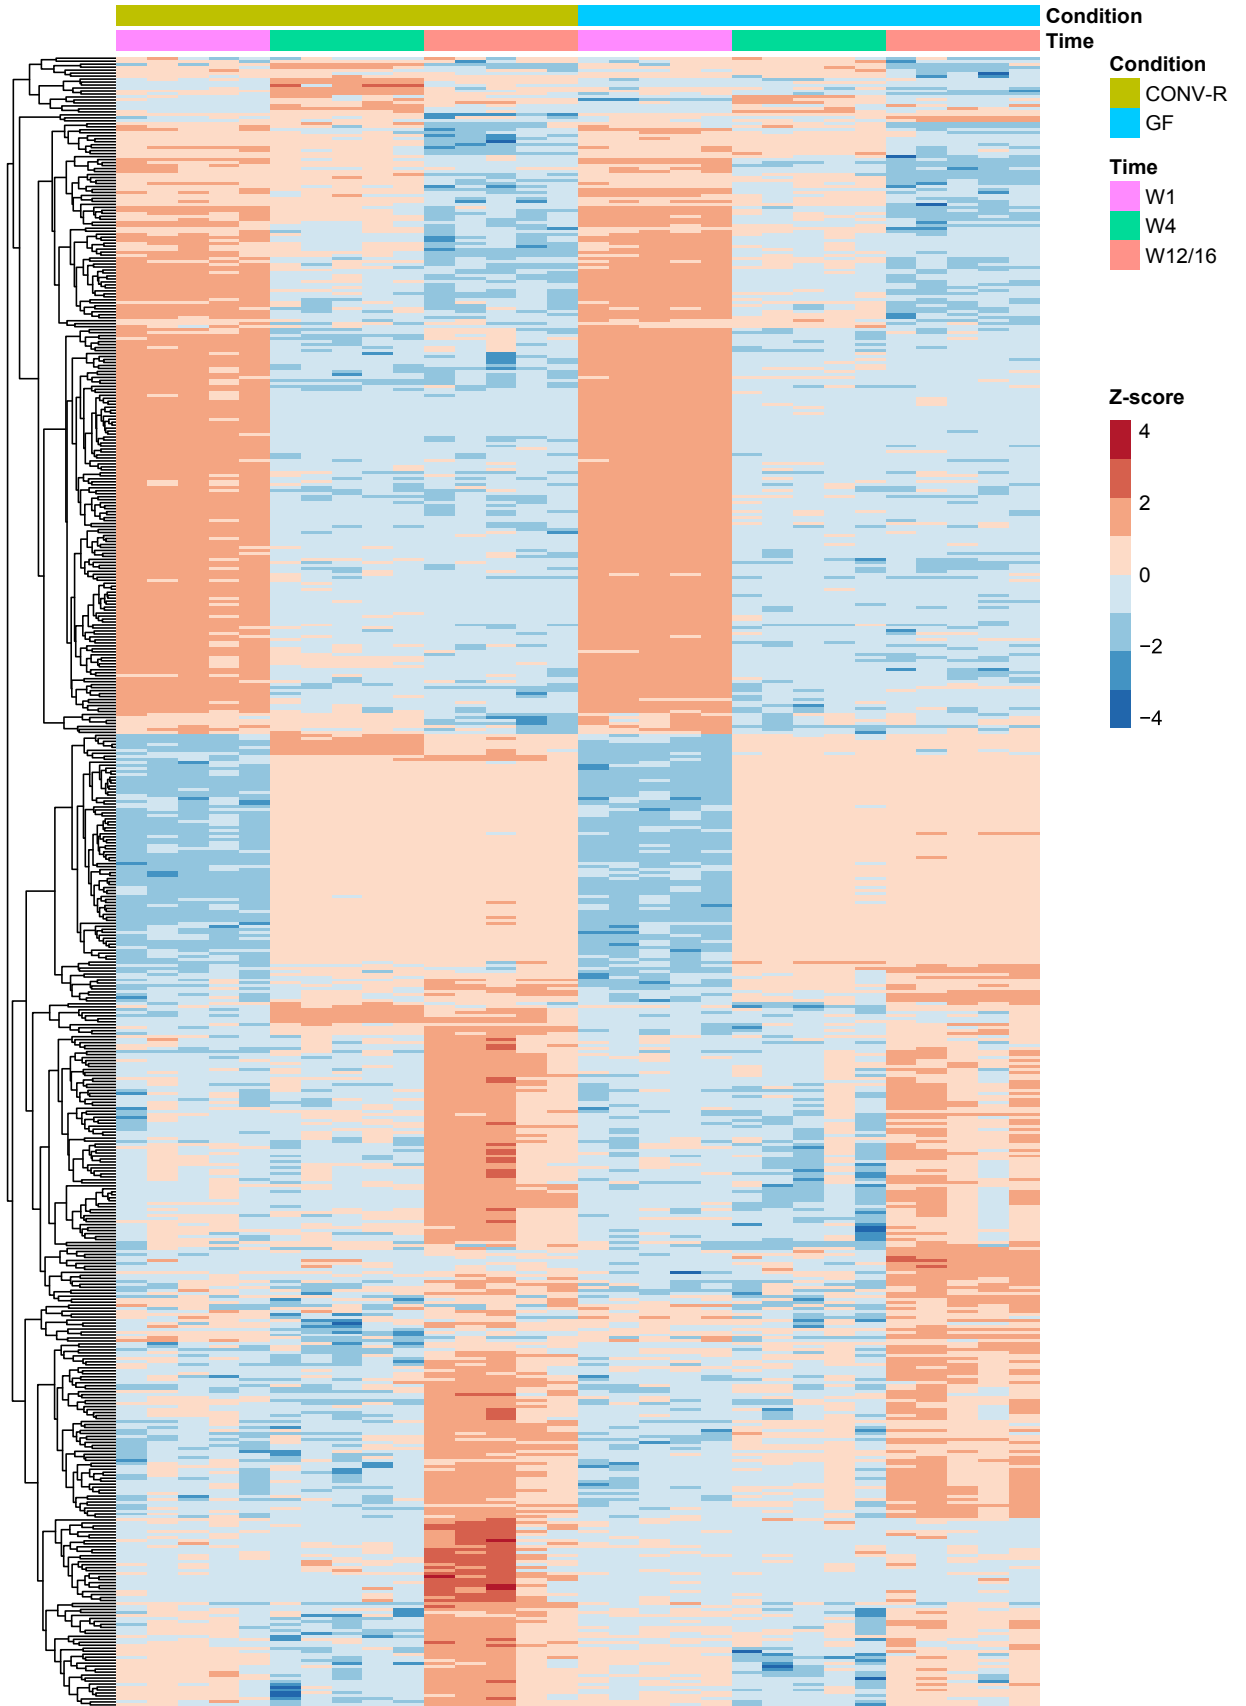

Supplement: 13073_2018_534_MOESM9_ESM.pdf [file 13073_2018_534_MOESM9_ESM.pdf]
